# Supplementary material for: The Peptidyl Prolyl Isomerase Rrd1 Regulates the Elongation of RNA Polymerase II during Transcriptional Stresses
Source: PLoS One. 2011 Aug 24;6(8):e23159. doi: 10.1371/journal.pone.0023159 (PMC3160861; doi:10.1371/journal.pone.0023159)
Supplement: File S1 — GO analysis of figures 2A. (XLS) [file pone.0023159.s002.xls]

## Sheet: GO analysis Figure 2A
Legend
N	gives the number of entities in the original query that have the row's attribute
X	Total number of entities that have the row's attribute in the entire space of entities under consideration (aka the "genespace").
LOD	Logarithm (base 10) of the odds ratio; positive and negative values indicate over- and underrepresentation, respectively
P	Single hypothesis one-sided P-value of the association between attribute and query (based on Fisher's Exact Test)
P-adj	Adjusted P-value: fraction (as a %) of 1000 null-hypothesis simulations having attributes with this single-hypothesis P value or smaller
Cluster W1
	OVERREPRESENTED ATTRIBUTES
	N	X	LOD	P	P_adj	attrib ID	attrib name
	167	235	1.16806	1.71432e-81	<0.001	GO:0005840	ribosome
	148	192	1.29549	2.64505e-80	<0.001	GO:0044445	cytosolic part
	223	416	0.861295	2.78235e-74	<0.001	GO:0006412	translation
	148	208	1.16073	4.80108e-72	<0.001	GO:0033279	ribosomal subunit
	146	206	1.15384	1.15346e-70	<0.001	GO:0003735	structural constituent of ribosome
	241	500	0.771684	1.84867e-68	<0.001	GO:0030529	ribonucleoprotein complex
	77	78	2.45469	1.90764e-60	<0.001	GO:0022625	cytosolic large ribosomal subunit
	170	334	0.788568	2.02969e-51	<0.001	GO:0005198	structural molecule activity
	263	695	0.584654	1.09979e-48	<0.001	GO:0043228	non-membrane-bounded organelle
	263	695	0.584654	1.09979e-48	<0.001	GO:0043232	intracellular non-membrane-bounded organelle
	86	119	1.15495	1.5846e-42	<0.001	GO:0015934	large ribosomal subunit
	54	57	1.92309	2.11359e-39	<0.001	GO:0022627	cytosolic small ribosomal subunit
	358	1216	0.438459	2.47706e-38	<0.001	GO:0043284	biopolymer biosynthetic process
	360	1227	0.436766	3.20267e-38	<0.001	GO:0009059	macromolecule biosynthetic process
	336	1123	0.441197	4.12839e-37	<0.001	GO:0034961	cellular biopolymer biosynthetic process
	447	1687	0.397994	7.65221e-37	<0.001	GO:0032991	macromolecular complex
	337	1133	0.437298	1.23599e-36	<0.001	GO:0034645	cellular macromolecule biosynthetic process
	427	1647	0.372313	4.99134e-32	<0.001	GO:0009058	biosynthetic process
	156	389	0.586039	3.46856e-31	<0.001	GO:0005622	intracellular
	406	1564	0.364557	4.52488e-30	<0.001	GO:0044249	cellular biosynthetic process
	62	89	1.08892	2.27088e-29	<0.001	GO:0015935	small ribosomal subunit
	623	2866	0.318265	3.52163e-26	<0.001	GO:0043283	biopolymer metabolic process
	609	2787	0.315407	7.49972e-26	<0.001	GO:0034960	cellular biopolymer metabolic process
	626	2907	0.310717	5.19414e-25	<0.001	GO:0043170	macromolecule metabolic process
	613	2833	0.30812	9.87028e-25	<0.001	GO:0044260	cellular macromolecule metabolic process
	294	1094	0.348734	8.79718e-23	<0.001	GO:0016070	RNA metabolic process
	175	545	0.432794	1.15308e-21	<0.001	GO:0022613	ribonucleoprotein complex biogenesis
	171	533	0.430917	4.12941e-21	<0.001	GO:0042254	ribosome biogenesis
	166	512	0.436545	5.11915e-21	<0.001	GO:0016072	rRNA metabolic process
	177	561	0.421374	5.68047e-21	<0.001	GO:0044085	cellular component biogenesis
	682	3347	0.286136	1.07833e-20	<0.001	GO:0044238	primary metabolic process
	205	698	0.381373	3.73586e-20	<0.001	GO:0034660	ncRNA metabolic process
	369	1533	0.294498	9.86708e-20	<0.001	GO:0044267	cellular protein metabolic process
	370	1539	0.293942	1.06787e-19	<0.001	GO:0019538	protein metabolic process
	124	352	0.480605	5.2264e-19	<0.001	GO:0003723	RNA binding
	89	231	0.533059	1.37005e-16	<0.001	GO:0006364	rRNA processing
	712	3653	0.252431	6.8829e-16	<0.001	GO:0044237	cellular metabolic process
	417	1907	0.23705	1.86225e-14	<0.001	GO:0005737	cytoplasm
	27	38	1.09666	8.94153e-14	<0.001	GO:0003743	translation initiation factor activity
	723	3785	0.233416	1.38743e-13	<0.001	GO:0008152	metabolic process
	34	57	0.886858	1.39706e-13	<0.001	GO:0008135	translation factor activity, nucleic acid binding
	52	117	0.628522	5.35538e-13	<0.001	GO:0030684	preribosome
	35	62	0.831108	5.98258e-13	<0.001	GO:0045182	translation regulator activity
	390	1794	0.224628	7.95902e-13	<0.001	GO:0006139	nucleobase, nucleoside, nucleotide and nucleic acid metabolic process
	506	2483	0.206652	3.93921e-12	<0.001	GO:0044422	organelle part
	506	2483	0.206652	3.93921e-12	<0.001	GO:0044446	intracellular organelle part
	103	329	0.394225	4.05285e-12	<0.001	GO:0034470	ncRNA processing
	33	60	0.805037	7.41348e-12	<0.001	GO:0030490	maturation of SSU-rRNA
	24	35	1.04517	7.5182e-12	<0.001	GO:0019843	rRNA binding
	124	427	0.350677	7.73445e-12	<0.001	GO:0006417	regulation of translation
	126	438	0.34508	1.05301e-11	<0.001	GO:0010608	posttranscriptional regulation of gene expression
	128	452	0.335432	2.34182e-11	<0.001	GO:0032268	regulation of cellular protein metabolic process
	32	59	0.791432	2.55673e-11	<0.001	GO:0000462	maturation of SSU-rRNA from tricistronic rRNA transcript (SSU-rRNA, 5.8S rRNA, LSU-rRNA)
	830	4585	0.230931	1.56617e-10	<0.001	GO:0044424	intracellular part
	133	497	0.300382	6.45055e-10	<0.001	GO:0051246	regulation of protein metabolic process
	46	114	0.553406	6.49019e-10	<0.001	GO:0051168	nuclear export
	30	59	0.732305	8.76593e-10	<0.001	GO:0042255	ribosome assembly
	66	195	0.436042	1.04726e-09	<0.001	GO:0005730	nucleolus
	28	54	0.748797	1.80461e-09	<0.001	GO:0042257	ribosomal subunit assembly
	130	493	0.290316	2.90041e-09	<0.001	GO:0006396	RNA processing
	53	146	0.480205	3.03512e-09	<0.001	GO:0006913	nucleocytoplasmic transport
	53	146	0.480205	3.03512e-09	<0.001	GO:0051169	nuclear transport
	13	15	1.44505	4.40439e-09	<0.001	GO:0000028	ribosomal small subunit assembly
	823	4584	0.208356	5.39691e-09	<0.001	GO:0009987	cellular process
	22	39	0.824464	1.31178e-08	<0.001	GO:0006407	rRNA export from nucleus
	22	39	0.824464	1.31178e-08	<0.001	GO:0006413	translational initiation
	22	39	0.824464	1.31178e-08	<0.001	GO:0051029	rRNA transport
	31	70	0.619136	3.15657e-08	<0.001	GO:0030686	90S preribosome
	687	3732	0.166271	6.077e-08	<0.001	GO:0043229	intracellular organelle
	687	3734	0.165575	6.87802e-08	<0.001	GO:0043226	organelle
	204	919	0.196227	3.98904e-07	<0.001	GO:0003676	nucleic acid binding
	34	89	0.510918	5.36282e-07	<0.001	GO:0006405	RNA export from nucleus
	9	10	1.51264	7.10678e-07	<0.001	GO:0043614	multi-eIF complex
	15	25	0.881995	9.66734e-07	<0.001	GO:0009156	ribonucleoside monophosphate biosynthetic process
	29	72	0.547531	1.0216e-06	<0.001	GO:0044452	nucleolar part
	724	4020	0.152169	1.34038e-06	<0.001	GO:0003674	molecular_function
	11	15	1.11911	1.58003e-06	<0.001	GO:0005736	DNA-directed RNA polymerase I complex
	11	15	1.11911	1.58003e-06	<0.001	GO:0005844	polysome
	15	26	0.842402	1.94194e-06	<0.001	GO:0009161	ribonucleoside monophosphate metabolic process
	853	4878	0.178428	2.59016e-06	<0.001	GO:0008150	biological_process
	882	5076	0.192176	2.60217e-06	<0.001	GO:0044464	cell part
	215	1002	0.176196	2.68155e-06	<0.001	GO:0044428	nuclear part
	38	111	0.436811	2.8462e-06	<0.001	GO:0051236	establishment of RNA localization
	37	107	0.44329	2.9291e-06	<0.001	GO:0050657	nucleic acid transport
	37	107	0.44329	2.9291e-06	<0.001	GO:0050658	RNA transport
	21	46	0.640104	2.95086e-06	<0.001	GO:0032040	small-subunit processome
	883	5086	0.191011	3.19866e-06	<0.001	GO:0005575	cellular_component
	15	27	0.806105	3.7103e-06	<0.001	GO:0009124	nucleoside monophosphate biosynthetic process
	8	9	1.4639	3.93398e-06	<0.001	GO:0005852	eukaryotic translation initiation factor 3 complex
	15	28	0.772597	6.78675e-06	0.002	GO:0009123	nucleoside monophosphate metabolic process
	10	14	1.07916	7.16306e-06	0.003	GO:0006450	regulation of translational fidelity
	41	129	0.388798	9.7044e-06	0.003	GO:0015931	nucleobase, nucleoside, nucleotide and nucleic acid transport
	10	15	0.991929	1.83266e-05	0.008	GO:0006414	translational elongation
	47	158	0.347829	1.61581e-05	0.008	GO:0006351	transcription, DNA-dependent
	47	160	0.339936	2.32137e-05	0.016	GO:0032774	RNA biosynthetic process
	34	104	0.405744	2.87284e-05	0.021	GO:0022618	ribonucleoprotein complex assembly
	9	13	1.03526	3.16422e-05	0.023	GO:0006446	regulation of translational initiation
	22	57	0.515751	4.51715e-05	0.031	GO:0006366	transcription from RNA polymerase II promoter
	212	1030	0.148619	6.18978e-05	0.039	GO:0010556	regulation of macromolecule biosynthetic process
	211	1026	0.147923	6.84475e-05	0.043	GO:0010468	regulation of gene expression
	452	2421	0.116546	6.78635e-05	0.043	GO:0044444	cytoplasmic part
	89	372	0.221941	7.30003e-05	0.045	GO:0034621	cellular macromolecular complex subunit organization
Cluster W2
	OVERREPRESENTED ATTRIBUTES
	N	X	LOD	P	P_adj	attrib ID	attrib name
	35	48	1.03011162690666	3.46363e-15	<0.001	GO:0015078	hydrogen ion transmembrane transporter activity
	35	52	0.917053938512038	1.68854e-13	<0.001	GO:0015077	monovalent inorganic cation transmembrane transporter activity
	591	2421	0.187569450531764	1.09255e-11	<0.001	GO:0044444	cytoplasmic part
	46	88	0.650690061908674	1.49687e-11	<0.001	GO:0009277	fungal-type cell wall
	165	522	0.293756601236194	5.25212e-11	<0.001	GO:0044429	mitochondrial part
	49	100	0.594714904517761	6.80156e-11	<0.001	GO:0005618	cell wall
	49	100	0.594714904517761	6.80156e-11	<0.001	GO:0030312	external encapsulating structure
	27	40	0.916345774785482	9.57369e-11	<0.001	GO:0006818	hydrogen transport
	47	97	0.584680394529037	2.72898e-10	<0.001	GO:0022890	inorganic cation transmembrane transporter activity
	22	30	1.02876751255748	4.44328e-10	<0.001	GO:0015992	proton transport
	19	24	1.15487337747863	7.79019e-10	<0.001	GO:0015985	energy coupled proton transport, down electrochemical gradient
	19	24	1.15487337747863	7.79019e-10	<0.001	GO:0015986	ATP synthesis coupled proton transport
	257	931	0.21763219662354	1.29137e-09	<0.001	GO:0031090	organelle membrane
	23	34	0.916465453303847	2.2864e-09	<0.001	GO:0006694	steroid biosynthetic process
	23	34	0.916465453303847	2.2864e-09	<0.001	GO:0016126	sterol biosynthetic process
	19	25	1.08223452870903	2.63454e-09	<0.001	GO:0006696	ergosterol biosynthetic process
	73	194	0.396182273492337	7.58755e-09	<0.001	GO:0007005	mitochondrion organization
	18	24	1.05901653985737	1.01052e-08	<0.001	GO:0019829	cation-transporting ATPase activity
	76	208	0.376038778163984	1.66518e-08	<0.001	GO:0005829	cytosol
	35	70	0.608269728658693	1.91002e-08	<0.001	GO:0015399	primary active transmembrane transporter activity
	35	70	0.608269728658693	1.91002e-08	<0.001	GO:0015405	P-P-bond-hydrolysis-driven transmembrane transporter activity
	19	27	0.965552542662723	2.17609e-08	<0.001	GO:0008204	ergosterol metabolic process
	35	71	0.596116495197371	3.04883e-08	<0.001	GO:0005576	extracellular region
	16	21	1.08125826253758	4.7829e-08	<0.001	GO:0031597	cytosolic proteasome complex
	16	21	1.08125826253758	4.7829e-08	<0.001	GO:0034515	proteasome storage granule
	23	38	0.786478331018759	5.34823e-08	<0.001	GO:0034220	transmembrane ion transport
	15	19	1.14099011897829	5.64346e-08	<0.001	GO:0046961	proton-transporting ATPase activity, rotational mechanism
	38	82	0.545652527022834	6.52083e-08	<0.001	GO:0001950	PME fraction
	44	102	0.490680470601809	8.45219e-08	<0.001	GO:0044455	mitochondrial membrane part
	10	10	1.9246758416961	1.05085e-07	<0.001	GO:0004129	cytochrome-c oxidase activity
	10	10	1.9246758416961	1.05085e-07	<0.001	GO:0015002	heme-copper terminal oxidase activity
	10	10	1.9246758416961	1.05085e-07	<0.001	GO:0016675	oxidoreductase activity, acting on heme group of donors
	10	10	1.9246758416961	1.05085e-07	<0.001	GO:0016676	oxidoreductase activity, acting on heme group of donors, oxygen as acceptor
	21	34	0.807311276258766	1.25249e-07	0.001	GO:0000502	proteasome complex
	782	3489	0.145667498983951	1.34819e-07	0.001	GO:0043227	membrane-bounded organelle
	782	3489	0.145667498983951	1.34819e-07	0.001	GO:0043231	intracellular membrane-bounded organelle
	60	159	0.395580551813728	1.50418e-07	0.001	GO:0019725	cellular homeostasis
	12	14	1.30195623215176	2.53816e-07	0.001	GO:0004298	threonine-type endopeptidase activity
	12	14	1.30195623215176	2.53816e-07	0.001	GO:0005839	proteasome core complex
	12	14	1.30195623215176	2.53816e-07	0.001	GO:0070003	threonine-type peptidase activity
	355	1426	0.159699735017029	2.66437e-07	0.001	GO:0044425	membrane part
	97	302	0.292024759977781	3.01678e-07	0.001	GO:0006091	generation of precursor metabolites and energy
	28	56	0.606377821671868	5.09009e-07	0.001	GO:0022900	electron transport chain
	260	1002	0.175279485488686	5.47162e-07	0.001	GO:0005739	mitochondrion
	22	39	0.714353625163362	5.88725e-07	0.001	GO:0006754	ATP biosynthetic process
	23	42	0.686421865771265	6.68238e-07	0.001	GO:0009145	purine nucleoside triphosphate biosynthetic process
	23	42	0.686421865771265	6.68238e-07	0.001	GO:0009206	purine ribonucleoside triphosphate biosynthetic process
	21	37	0.719896071352286	9.29083e-07	0.001	GO:0042625	ATPase activity, coupled to transmembrane movement of ions
	22	40	0.690131548442082	1.06156e-06	0.002	GO:0046034	ATP metabolic process
	11	13	1.26539097453323	1.09259e-06	0.002	GO:0005199	structural constituent of cell wall
	11	13	1.26539097453323	1.09259e-06	0.002	GO:0033177	proton-transporting two-sector ATPase complex, proton-transporting domain
	23	43	0.664614183073874	1.16542e-06	0.002	GO:0009144	purine nucleoside triphosphate metabolic process
	23	43	0.664614183073874	1.16542e-06	0.002	GO:0009205	purine ribonucleoside triphosphate metabolic process
	95	304	0.273525279237654	1.60458e-06	0.002	GO:0031966	mitochondrial membrane
	23	44	0.643841133199073	1.98088e-06	0.002	GO:0009201	ribonucleoside triphosphate biosynthetic process
	8	8	1.83220073068982	2.62714e-06	0.005	GO:0005751	mitochondrial respiratory chain complex IV
	8	8	1.83220073068982	2.62714e-06	0.005	GO:0006123	mitochondrial electron transport, cytochrome c to oxygen
	8	8	1.83220073068982	2.62714e-06	0.005	GO:0045277	respiratory chain complex IV
	54	149	0.366200900021598	2.72855e-06	0.005	GO:0008610	lipid biosynthetic process
	119	406	0.235389156467198	2.98129e-06	0.005	GO:0005783	endoplasmic reticulum
	23	45	0.624008605970233	3.29117e-06	0.006	GO:0009199	ribonucleoside triphosphate metabolic process
	23	45	0.624008605970233	3.29117e-06	0.006	GO:0015672	monovalent inorganic cation transport
	23	45	0.624008605970233	3.29117e-06	0.006	GO:0016125	sterol metabolic process
	396	1653	0.136701630172292	3.98132e-06	0.006	GO:0016020	membrane
	11	14	1.119174810916	4.1712e-06	0.006	GO:0033178	proton-transporting two-sector ATPase complex, catalytic domain
	90	290	0.268177306767882	4.20149e-06	0.006	GO:0005789	endoplasmic reticulum membrane
	140	497	0.212664460038275	4.28629e-06	0.006	GO:0051246	regulation of protein metabolic process
	9	10	1.4036482892339	4.31021e-06	0.006	GO:0015450	P-P-bond-hydrolysis-driven protein transmembrane transporter activity
	9	10	1.4036482892339	4.31021e-06	0.006	GO:0022884	macromolecule transmembrane transporter activity
	14	21	0.889559180303762	4.61035e-06	0.007	GO:0022904	respiratory electron transport chain
	23	46	0.605034774751301	5.34175e-06	0.007	GO:0009142	nucleoside triphosphate biosynthetic process
	17	29	0.750001921942552	5.68379e-06	0.007	GO:0006096	glycolysis
	50	138	0.365323690129509	6.42905e-06	0.007	GO:0008324	cation transmembrane transporter activity
	95	314	0.252353983393835	7.52893e-06	0.01	GO:0044432	endoplasmic reticulum part
	57	165	0.33397527776222	8.0681e-06	0.01	GO:0015075	ion transmembrane transporter activity
	11	15	1.00994219566519	1.279e-05	0.013	GO:0000307	cyclin-dependent protein kinase holoenzyme complex
	7	7	1.77749112792504	1.31229e-05	0.013	GO:0000220	vacuolar proton-transporting V-type ATPase, V0 domain
	7	7	1.77749112792504	1.31229e-05	0.013	GO:0033179	proton-transporting V-type ATPase, V0 domain
	403	1704	0.127743100410047	1.32804e-05	0.013	GO:0065007	biological regulation
	27	61	0.507001838457942	1.52069e-05	0.014	GO:0009150	purine ribonucleotide metabolic process
	13	20	0.8581712865427	1.55317e-05	0.014	GO:0000079	regulation of cyclin-dependent protein kinase activity
	13	20	0.8581712865427	1.55317e-05	0.014	GO:0019319	hexose biosynthetic process
	29	68	0.47898523093904	1.77972e-05	0.016	GO:0006163	purine nucleotide metabolic process
	28	65	0.486393404267711	1.97683e-05	0.019	GO:0006164	purine nucleotide biosynthetic process
	123	438	0.208250360886023	2.02181e-05	0.019	GO:0010608	posttranscriptional regulation of gene expression
	23	49	0.55259119368421	2.0242e-05	0.019	GO:0008202	steroid metabolic process
	26	59	0.503420548387382	2.39831e-05	0.021	GO:0009152	purine ribonucleotide biosynthetic process
	15	26	0.732887270180741	2.67169e-05	0.021	GO:0016538	cyclin-dependent protein kinase regulator activity
	23	50	0.536415814556781	3.04321e-05	0.021	GO:0009141	nucleoside triphosphate metabolic process
	23	50	0.536415814556781	3.04321e-05	0.021	GO:0045454	cell redox homeostasis
	26	60	0.490557574526282	3.43678e-05	0.026	GO:0016820	hydrolase activity, acting on acid anhydrides, catalyzing transmembrane movement of substances
	26	60	0.490557574526282	3.43678e-05	0.026	GO:0042626	ATPase activity, coupled to transmembrane movement of substances
	125	452	0.198661841569302	3.78218e-05	0.026	GO:0032268	regulation of cellular protein metabolic process
	119	427	0.202803307070746	4.04706e-05	0.027	GO:0006417	regulation of translation
	26	61	0.478059612605857	4.85992e-05	0.034	GO:0043492	ATPase activity, coupled to movement of substances
	15	27	0.696586808344877	4.89897e-05	0.037	GO:0006090	pyruvate metabolic process
	61	191	0.282485086714455	6.03808e-05	0.038	GO:0019866	organelle inner membrane
	64	203	0.274496083708983	6.19665e-05	0.038	GO:0006066	cellular alcohol metabolic process
	70	227	0.261003192833719	6.26473e-05	0.038	GO:0000267	cell fraction
	91	313	0.226087030500559	6.42461e-05	0.043	GO:0022892	substrate-specific transporter activity
	810	3734	0.110159757503822	6.4736e-05	0.044	GO:0043226	organelle
Cluster W3
	OVERREPRESENTED ATTRIBUTES
	N	X	LOD	P	P_adj	attrib ID	attrib name
	94	303	0.412733192551091	4.10666e-12	<0.001	GO:0009628	response to abiotic stimulus
	67	196	0.469165855045606	5.63498e-11	<0.001	GO:0009408	response to heat
	62	176	0.488077411443419	7.26996e-11	<0.001	GO:0034605	cellular response to heat
	68	215	0.41797169417277	1.85819e-09	<0.001	GO:0009266	response to temperature stimulus
	84	290	0.365727767934813	2.76494e-09	<0.001	GO:0006807	nitrogen compound metabolic process
	14	18	1.24595878472026	7.92884e-09	<0.001	GO:0006536	glutamate metabolic process
	27	57	0.69663479587328	1.52451e-08	<0.001	GO:0009064	glutamine family amino acid metabolic process
	17	28	0.920930222266222	6.77688e-08	<0.001	GO:0009084	glutamine family amino acid biosynthetic process
	95	370	0.293092030402225	1.87017e-07	<0.001	GO:0006082	organic acid metabolic process
	43	128	0.450953944448435	2.97008e-07	<0.001	GO:0008652	amino acid biosynthetic process
	93	364	0.289607497560454	3.24851e-07	<0.001	GO:0019752	carboxylic acid metabolic process
	40	117	0.461851931771434	4.57532e-07	<0.001	GO:0007039	vacuolar protein catabolic process
	44	136	0.426526121631388	7.16382e-07	<0.001	GO:0009309	amine biosynthetic process
	71	262	0.320871153340667	8.6199e-07	<0.001	GO:0034641	cellular nitrogen compound metabolic process
	44	137	0.421771320837894	8.99749e-07	<0.001	GO:0044271	nitrogen compound biosynthetic process
	164	752	0.207016856375255	1.08726e-06	<0.001	GO:0006950	response to stress
	70	259	0.31900169366178	1.14935e-06	<0.001	GO:0009308	cellular amine metabolic process
	10	13	1.21318612222637	1.52287e-06	<0.001	GO:0006537	glutamate biosynthetic process
	69	258	0.312312677547344	2.07682e-06	<0.001	GO:0006519	cellular amino acid and derivative metabolic process
	11	16	1.05668782095352	2.65096e-06	0.001	GO:0006525	arginine metabolic process
	17	34	0.738088181062792	2.88566e-06	0.002	GO:0051187	cofactor catabolic process
	63	235	0.312493760497791	5.35628e-06	0.003	GO:0006520	amino acid metabolic process
	19	43	0.639287219464069	7.7243e-06	0.004	GO:0030479	actin cortical patch
	16	33	0.712076442742049	9.44201e-06	0.006	GO:0009109	coenzyme catabolic process
	12	21	0.855660208340691	1.48798e-05	0.01	GO:0017171	serine hydrolase activity
	174	841	0.175901262494567	1.58528e-05	0.011	GO:0044248	cellular catabolic process
	180	880	0.169762252646388	2.25445e-05	0.014	GO:0009056	catabolic process
	35	112	0.402285307233997	2.28579e-05	0.014	GO:0005759	mitochondrial matrix
	205	1030	0.156618346253489	3.40039e-05	0.02	GO:0050896	response to stimulus
	14	29	0.707920369791453	3.6653e-05	0.022	GO:0006099	tricarboxylic acid cycle
	14	29	0.707920369791453	3.6653e-05	0.022	GO:0046356	acetyl-CoA catabolic process
	32	102	0.40424721415254	4.66734e-05	0.024	GO:0030036	actin cytoskeleton organization
	38	130	0.360808261426966	5.47333e-05	0.029	GO:0006725	cellular aromatic compound metabolic process
	30	94	0.414870633242251	5.59819e-05	0.029	GO:0044448	cell cortex part
	114	522	0.198534272648641	5.64758e-05	0.029	GO:0044429	mitochondrial part
	17	41	0.591373939862979	6.3071e-05	0.042	GO:0003779	actin binding
	72	300	0.247455756787747	7.17201e-05	0.048	GO:0016491	oxidoreductase activity
	50	189	0.301852579236376	7.30143e-05	0.049	GO:0007010	cytoskeleton organization
	33	109	0.381894223348513	7.87288e-05	0.05	GO:0030029	actin filament-based process
Cluster W4
	OVERREPRESENTED ATTRIBUTES
	N	X	LOD	P	P_adj	attrib ID	attrib name
	152	880	0.248999491578564	2.35867e-08	<0.001	GO:0009056	catabolic process
	76	356	0.347752445621188	2.91176e-08	<0.001	GO:0030163	protein catabolic process
	145	841	0.245617737183298	6.21994e-08	0.001	GO:0044248	cellular catabolic process
	73	343	0.344932738885423	6.4033e-08	0.001	GO:0044257	cellular protein catabolic process
	73	344	0.343246511431994	7.26161e-08	0.001	GO:0034962	cellular biopolymer catabolic process
	52	225	0.385636553670563	3.97255e-07	0.001	GO:0019941	modification-dependent protein catabolic process
	53	233	0.376738102743622	5.23819e-07	0.001	GO:0051603	proteolysis involved in cellular protein catabolic process
	52	228	0.377944891547102	6.17141e-07	0.001	GO:0043632	modification-dependent macromolecule catabolic process
	71	366	0.291104441494382	3.92145e-06	0.003	GO:0006508	proteolysis
	32	124	0.44412562295838	6.44412e-06	0.006	GO:0007034	vacuolar transport
	39	169	0.380789980490652	1.2047e-05	0.016	GO:0006511	ubiquitin-dependent protein catabolic process
	94	543	0.232823417136504	1.673e-05	0.017	GO:0009057	macromolecule catabolic process
	91	522	0.236010136639196	1.74405e-05	0.018	GO:0044265	cellular macromolecule catabolic process
	86	490	0.238501030249211	2.34265e-05	0.026	GO:0043285	biopolymer catabolic process
	19	62	0.545632247666318	3.9545e-05	0.031	GO:0006623	protein targeting to vacuole
Cluster W5
	OVERREPRESENTED ATTRIBUTES
	N	X	LOD	P	P_adj	attrib ID	attrib name
	149	449	0.3378971503723	1.33315e-12	<0.001	GO:0022402	cell cycle process
	35	63	0.716944869323547	2.44017e-10	<0.001	GO:0043566	structure-specific DNA binding
	128	397	0.313841070549629	5.34253e-10	<0.001	GO:0006259	DNA metabolic process
	94	267	0.36703555203296	8.39647e-10	<0.001	GO:0022403	cell cycle phase
	148	489	0.275189195697738	3.25008e-09	<0.001	GO:0003677	DNA binding
	23	35	0.89272646293621	3.39375e-09	<0.001	GO:0003690	double-stranded DNA binding
	55	134	0.468405138677746	7.45364e-09	<0.001	GO:0007126	meiosis
	90	271	0.326399568804975	5.03342e-08	<0.001	GO:0044427	chromosomal part
	79	230	0.347069288507709	6.82678e-08	<0.001	GO:0006281	DNA repair
	91	281	0.309721551349903	1.59636e-07	0.001	GO:0006974	response to DNA damage stimulus
	81	242	0.329961854795495	1.65733e-07	0.001	GO:0034984	cellular response to DNA damage stimulus
	46	114	0.453858755401631	2.33573e-07	0.001	GO:0006310	DNA recombination
	24	45	0.674870286710159	4.70262e-07	0.001	GO:0010927	cellular component assembly involved in morphogenesis
	24	45	0.674870286710159	4.70262e-07	0.001	GO:0030476	ascospore wall assembly
	24	45	0.674870286710159	4.70262e-07	0.001	GO:0042244	spore wall assembly
	24	45	0.674870286710159	4.70262e-07	0.001	GO:0048646	anatomical structure formation involved in morphogenesis
	19	32	0.776724894980449	8.33015e-07	0.001	GO:0006308	DNA catabolic process
	68	206	0.318337791763671	2.90781e-06	0.001	GO:0048869	cellular developmental process
	22	43	0.637157120147799	3.54703e-06	0.001	GO:0007131	reciprocal meiotic recombination
	64	192	0.324139697808211	3.95129e-06	0.002	GO:0044454	nuclear chromosome part
	51	145	0.358020666698591	6.97438e-06	0.008	GO:0030154	cell differentiation
	51	145	0.358020666698591	6.97438e-06	0.008	GO:0030435	sporulation resulting in formation of a cellular spore
	51	145	0.358020666698591	6.97438e-06	0.008	GO:0043934	sporulation
	18	33	0.693324988273089	8.61662e-06	0.01	GO:0007062	sister chromatid cohesion
	8	9	1.36742317482248	1.62666e-05	0.023	GO:0000217	DNA secondary structure binding
	104	365	0.228384079448316	1.76287e-05	0.023	GO:0051276	chromosome organization
	75	245	0.27008902510553	1.99692e-05	0.023	GO:0006914	autophagy
	15	26	0.745381622325441	2.00439e-05	0.023	GO:0007064	mitotic sister chromatid cohesion
	15	27	0.709081660205991	3.69418e-05	0.032	GO:0040020	regulation of meiosis
	21	46	0.542595024307835	5.42691e-05	0.046	GO:0000228	nuclear chromosome
Cluster W6
	OVERREPRESENTED ATTRIBUTES
	N	X	LOD	P	P_adj	attrib ID	attrib name
	297	698	0.748312436203212	2.50445e-79	<0.001	GO:0034660	ncRNA metabolic process
	255	545	0.804989113772524	1.58249e-77	<0.001	GO:0022613	ribonucleoprotein complex biogenesis
	257	561	0.787979512799435	1.06617e-75	<0.001	GO:0044085	cellular component biogenesis
	249	533	0.800452360112011	2.57639e-75	<0.001	GO:0042254	ribosome biogenesis
	237	512	0.786279745914619	2.69281e-70	<0.001	GO:0016072	rRNA metabolic process
	372	1094	0.615137926190501	4.05269e-69	<0.001	GO:0016070	RNA metabolic process
	156	329	0.767206991579863	1.27704e-46	<0.001	GO:0034470	ncRNA processing
	462	1794	0.455662486313837	2.24104e-46	<0.001	GO:0006139	nucleobase, nucleoside, nucleotide and nucleic acid metabolic process
	191	493	0.622150884065476	2.94556e-41	<0.001	GO:0006396	RNA processing
	112	231	0.766566935645766	2.26065e-34	<0.001	GO:0006364	rRNA processing
	101	195	0.820177619651091	3.79725e-34	<0.001	GO:0005730	nucleolus
	438	1900	0.355952914627584	3.30769e-29	<0.001	GO:0005634	nucleus
	275	1002	0.41179083101739	1.23943e-28	<0.001	GO:0044428	nuclear part
	100	228	0.679005364095266	2.76505e-26	<0.001	GO:0009451	RNA modification
	555	2787	0.292025689708777	3.29427e-21	<0.001	GO:0034960	cellular biopolymer metabolic process
	61	117	0.808858354941649	4.29292e-21	<0.001	GO:0030684	preribosome
	558	2833	0.283245519191144	4.77528e-20	<0.001	GO:0044260	cellular macromolecule metabolic process
	559	2866	0.274386653565191	6.4111e-19	<0.001	GO:0043283	biopolymer metabolic process
	563	2907	0.269676273795453	2.58865e-18	<0.001	GO:0043170	macromolecule metabolic process
	82	218	0.55713682623666	1.05153e-16	<0.001	GO:0006399	tRNA metabolic process
	36	59	0.953787353011	7.61322e-16	<0.001	GO:0000469	cleavages during rRNA processing
	614	3347	0.241647176174967	1.39501e-14	<0.001	GO:0044238	primary metabolic process
	37	69	0.824442297965015	9.14583e-14	<0.001	GO:0006400	tRNA modification
	105	352	0.407784979362925	4.2584e-13	<0.001	GO:0003723	RNA binding
	47	108	0.652540932711731	1.00352e-12	<0.001	GO:0008033	tRNA processing
	36	70	0.786118655051482	1.05672e-12	<0.001	GO:0030686	90S preribosome
	20	26	1.25516820244819	3.21252e-12	<0.001	GO:0000480	endonucleolytic cleavage in 5'-ETS of tricistronic rRNA transcript (SSU-rRNA, 5.8S rRNA, LSU-rRNA)
	208	914	0.263614601013109	2.445e-11	<0.001	GO:0043412	biopolymer modification
	20	28	1.13849650753294	3.19524e-11	<0.001	GO:0000472	endonucleolytic cleavage to generate mature 5'-end of SSU-rRNA from (SSU-rRNA, 5.8S rRNA, LSU-rRNA)
	20	29	1.09010874120054	8.83765e-11	<0.001	GO:0000967	rRNA 5'-end processing
	20	29	1.09010874120054	8.83765e-11	<0.001	GO:0034471	ncRNA 5'-end processing
	20	30	1.04655994476288	2.27586e-10	<0.001	GO:0000966	RNA 5'-end processing
	41	104	0.576909280572839	1.1666e-09	<0.001	GO:0022618	ribonucleoprotein complex assembly
	202	919	0.239605608635078	1.41677e-09	<0.001	GO:0003676	nucleic acid binding
	22	38	0.891143766006557	1.48421e-09	<0.001	GO:0000447	endonucleolytic cleavage in ITS1 to separate SSU-rRNA from 5.8S rRNA and LSU-rRNA from tricistronic rRNA transcript (SSU-rRNA, 5.8S rRNA, LSU-rRNA)
	635	3653	0.189900686728129	2.14521e-09	<0.001	GO:0044237	cellular metabolic process
	20	33	0.937166071914859	2.74638e-09	<0.001	GO:0030687	preribosome, large subunit precursor
	22	39	0.865506447415903	2.92225e-09	<0.001	GO:0000478	endonucleolytic cleavages during rRNA processing
	22	39	0.865506447415903	2.92225e-09	<0.001	GO:0000479	endonucleolytic cleavage of tricistronic rRNA transcript (SSU-rRNA, 5.8S rRNA, LSU-rRNA)
	24	46	0.793880071001587	4.60812e-09	<0.001	GO:0032040	small-subunit processome
	19	31	0.948480124471965	5.30288e-09	<0.001	GO:0004004	ATP-dependent RNA helicase activity
	19	31	0.948480124471965	5.30288e-09	<0.001	GO:0008186	RNA-dependent ATPase activity
	11	12	1.63710536234964	9.62158e-09	<0.001	GO:0000460	maturation of 5.8S rRNA
	11	12	1.63710536234964	9.62158e-09	<0.001	GO:0000466	maturation of 5.8S rRNA from tricistronic rRNA transcript (SSU-rRNA, 5.8S rRNA, LSU-rRNA)
	22	41	0.818343408654496	1.03225e-08	<0.001	GO:0003724	RNA helicase activity
	14	19	1.17458214434129	1.72123e-08	<0.001	GO:0000467	exonucleolytic trimming to generate mature 3'-end of 5.8S rRNA from tricistronic rRNA transcript (SSU-rRNA, 5.8S rRNA, LSU-rRNA)
	14	19	1.17458214434129	1.72123e-08	<0.001	GO:0030515	snoRNA binding
	25	52	0.724163482110215	1.91613e-08	<0.001	GO:0043414	biopolymer methylation
	20	36	0.849766349465149	2.21857e-08	<0.001	GO:0043628	ncRNA 3'-end processing
	13	17	1.23031058459877	2.73908e-08	<0.001	GO:0000292	RNA fragment catabolic process
	34	86	0.576835683961106	2.85773e-08	<0.001	GO:0008168	methyltransferase activity
	648	3785	0.177089401986763	3.07384e-08	<0.001	GO:0008152	metabolic process
	25	53	0.708567926054233	3.11158e-08	<0.001	GO:0032259	methylation
	27	61	0.65883949818132	4.72083e-08	<0.001	GO:0008757	S-adenosylmethionine-dependent methyltransferase activity
	14	20	1.10194843809455	4.93756e-08	<0.001	GO:0000459	exonucleolytic trimming during rRNA processing
	34	88	0.56043088470941	5.61925e-08	<0.001	GO:0016741	transferase activity, transferring one-carbon groups
	26	59	0.655133205652688	9.35926e-08	<0.001	GO:0000462	maturation of SSU-rRNA from tricistronic rRNA transcript (SSU-rRNA, 5.8S rRNA, LSU-rRNA)
	798	4878	0.212881714697212	1.03242e-07	<0.001	GO:0008150	biological_process
	20	39	0.776965992113088	1.32521e-07	<0.001	GO:0000027	ribosomal large subunit assembly
	26	60	0.642275431556429	1.41702e-07	<0.001	GO:0030490	maturation of SSU-rRNA
	16	27	0.910807044534179	1.73566e-07	<0.001	GO:0008173	RNA methyltransferase activity
	29	72	0.588862630522512	1.86918e-07	<0.001	GO:0044452	nucleolar part
	600	3489	0.161125802925041	2.00962e-07	<0.001	GO:0043227	membrane-bounded organelle
	600	3489	0.161125802925041	2.00962e-07	<0.001	GO:0043231	intracellular membrane-bounded organelle
	25	58	0.637950789289779	2.79603e-07	<0.001	GO:0008026	ATP-dependent helicase activity
	25	58	0.637950789289779	2.79603e-07	<0.001	GO:0070035	purine NTP-dependent helicase activity
	12	17	1.10918361445028	4.10522e-07	<0.001	GO:0008175	tRNA methyltransferase activity
	754	4584	0.180971758586881	6.49298e-07	0.002	GO:0009987	cellular process
	14	23	0.936888976846899	6.63751e-07	0.002	GO:0016073	snRNA metabolic process
	14	23	0.936888976846899	6.63751e-07	0.002	GO:0031125	rRNA 3'-end processing
	11	15	1.15973513314471	7.02481e-07	0.002	GO:0000463	maturation of LSU-rRNA from tricistronic rRNA transcript (SSU-rRNA, 5.8S rRNA, LSU-rRNA)
	11	15	1.15973513314471	7.02481e-07	0.002	GO:0000470	maturation of LSU-rRNA
	11	15	1.15973513314471	7.02481e-07	0.002	GO:0016180	snRNA processing
	31	84	0.527607627884193	7.16371e-07	0.002	GO:0006730	one-carbon compound metabolic process
	15	28	0.813381038772539	2.48446e-06	0.005	GO:0042273	ribosomal large subunit biogenesis
	28	77	0.516789111662461	3.46001e-06	0.006	GO:0016779	nucleotidyltransferase activity
	35	108	0.441835347576936	4.67529e-06	0.007	GO:0016458	gene silencing
	26	70	0.530898771174746	4.90641e-06	0.007	GO:0031123	RNA 3'-end processing
	14	26	0.817453213437451	5.01159e-06	0.007	GO:0005654	nucleoplasm
	13	23	0.861835421724109	5.37627e-06	0.007	GO:0001510	RNA methylation
	9	12	1.18505087966221	5.84145e-06	0.007	GO:0000176	nuclear exosome (RNase complex)
	9	12	1.18505087966221	5.84145e-06	0.007	GO:0000178	exosome (RNase complex)
	146	695	0.198816675024676	7.2956e-06	0.009	GO:0043228	non-membrane-bounded organelle
	146	695	0.198816675024676	7.2956e-06	0.009	GO:0043232	intracellular non-membrane-bounded organelle
	20	48	0.611405810368792	8.20492e-06	0.01	GO:0004540	ribonuclease activity
	111	500	0.225478544850109	8.32351e-06	0.01	GO:0030529	ribonucleoprotein complex
	8	10	1.28248923747025	9.21593e-06	0.011	GO:0034968	histone lysine methylation
	13	24	0.822243761879052	1.01198e-05	0.012	GO:0016796	exonuclease activity, active with either ribo- or deoxyribonucleic acids and producing 5'-phosphomonoesters
	11	18	0.937637266227891	1.05239e-05	0.012	GO:0030488	tRNA methylation
	7	8	1.44959581436873	1.25842e-05	0.016	GO:0034661	ncRNA catabolic process
	17	38	0.664260526990521	1.25926e-05	0.016	GO:0004527	exonuclease activity
	49	179	0.338864606060375	1.44434e-05	0.017	GO:0018193	peptidyl-amino acid modification
	9	13	1.07582340288179	1.64512e-05	0.017	GO:0034472	snRNA 3'-end processing
	30	92	0.444836466994255	1.94024e-05	0.019	GO:0004518	nuclease activity
	28	84	0.458759317950154	2.31504e-05	0.022	GO:0004386	helicase activity
	22	59	0.532845588879302	2.43635e-05	0.024	GO:0042255	ribosome assembly
	744	4585	0.147351649321633	3.49115e-05	0.026	GO:0044424	intracellular part
	12	23	0.78834999067317	3.69067e-05	0.027	GO:0008408	3'-5' exonuclease activity
	7	9	1.22766408911554	4.91369e-05	0.038	GO:0051568	histone H3-K4 methylation
	811	5076	0.167670391777404	5.31855e-05	0.043	GO:0044464	cell part
	73	312	0.249385371176993	5.55169e-05	0.043	GO:0034622	cellular macromolecular complex assembly
	23	66	0.487246558835679	5.60407e-05	0.043	GO:0016074	snoRNA metabolic process
	812	5086	0.166717985376391	6.15731e-05	0.046	GO:0005575	cellular_component
	20	54	0.527930899508078	6.35139e-05	0.046	GO:0042257	ribosomal subunit assembly
